# Supplementary material for: Effect of Porcine Colostral Exosomes on T Cells in the Peripheral Blood of Suckling Piglets
Source: MDPI journal article supplement (doi:10.3390/ani12172172), 2022-08-24
Supplement: s1 [file s1]

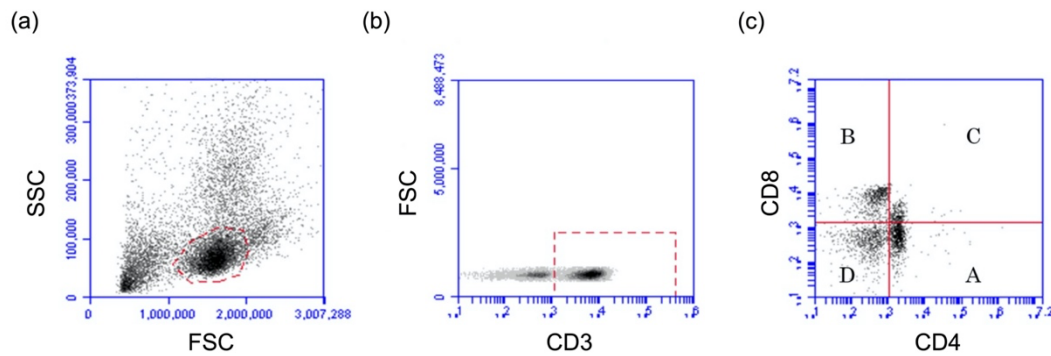

**Figure S1. Representative images of the flow cytometric analysis of T cell subsets.** First, based on size, lymphocytes were identified from peripheral mononuclear cells (red circle, a). Among lymphocytes, CD3 positive cells were then identified as T cells (red square, b). Based on the expression of CD4 and CD8, total T cells were sorted and then identified as follows: CD4+CD8- T cells, helper T (Th) cells (fraction A, c); CD4-CD8+ T cells, cytotoxic T (Tc) cells (fraction B, c); CD4+CD8+ T cells, double positive T (DP-T) cells (fraction C, c); CD4-CD8- T cells, double negative T (DN-T) cells (fraction D, c).

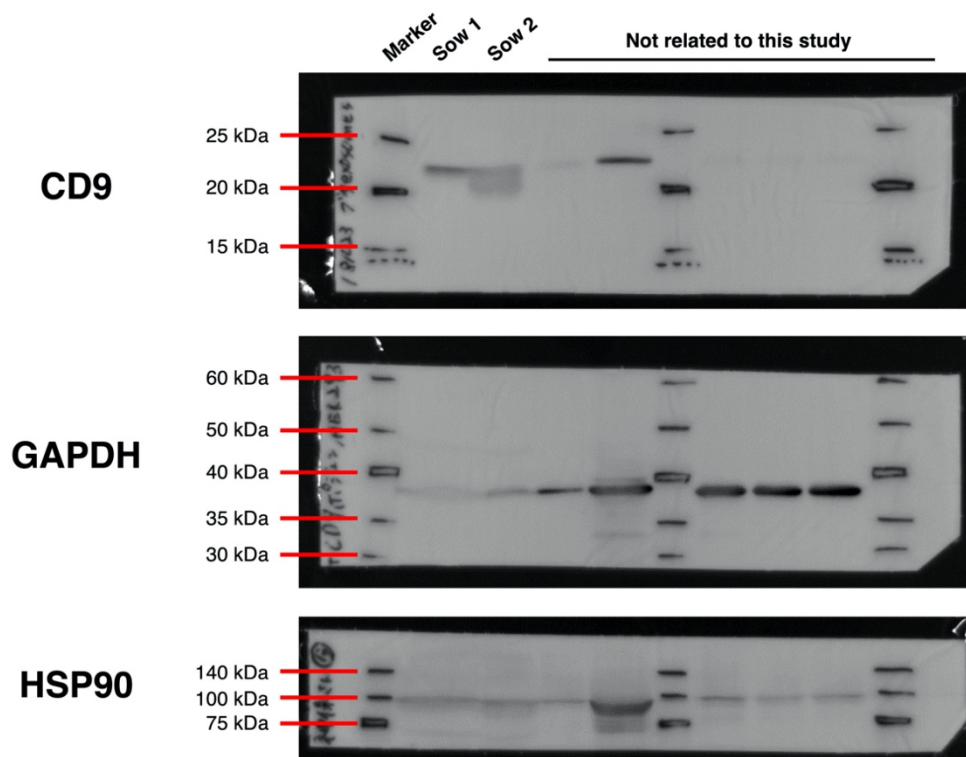

**Figure S2. Whole blot images of western blotting analysis.**

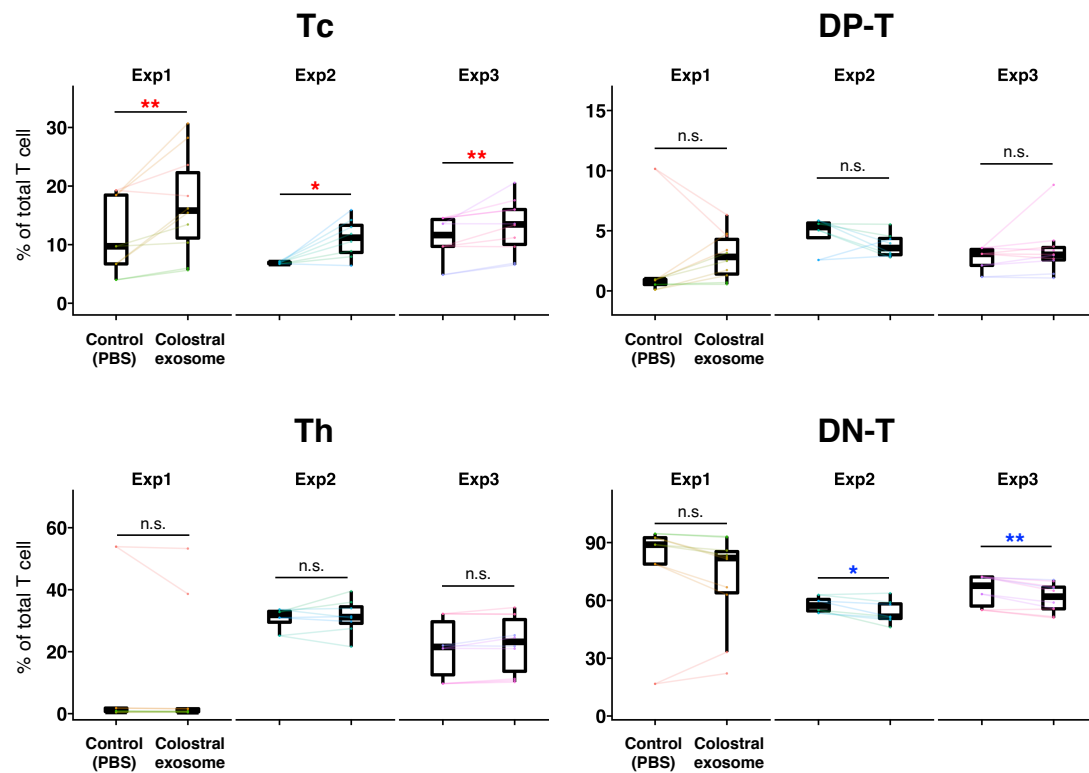

**Figure S3. Effect of porcine milk-derived exosomes on the proportion of each T cell subset in piglet PBMCs in each experiment.** The data presented in Figure 2a were separated by each experiment and visualized. Piglet PBMCs were cultured with or without exosome solution isolated from colostrum. See caption of Fig 2 for the details.
